# Supplementary material
Source: publisher figshare collection journal article supplement (https://acs.figshare.com/ndownloader/files/24931256)
Supplement: Supplementary file 1 [file 24931256]

## Supplementary Information

### Fluorocarbon Plasma Gas Passivation Enhances Performance of Porous Silicon for Desorption/Ionisation Mass Spectrometry

Rajpreet Singh Minhas<sup>†,‡,§</sup>, E. Eduardo Antunez<sup>†,‡</sup>, Taryn M. Guinan<sup>†,‡,||</sup>, Thomas R. Gengenbach<sup>§</sup>, David A. Rudd<sup>†,‡\*</sup> and Nicolas H. Voelcker<sup>†,‡,§,⊥\*</sup>

<sup>†</sup>Drug Delivery, Disposition and Dynamics, Monash University, Parkville, Victoria, 3052, Australia.

<sup>‡</sup>Melbourne Centre for Nanofabrication, Victorian Node of the Australian National Fabrication Facility, Clayton, Victoria, 3168, Australia.

<sup>§</sup>Commonwealth Scientific and Industrial Research Organisation (CSIRO), Clayton, Victoria, 3168, Australia.

<sup>||</sup>Leica Microsystems, Mount Waverley, Victoria, 3149, Australia.

<sup>⊥</sup>Department of Materials Science and Engineering, Monash University, Clayton, Victoria, 3800, Australia.

\*Corresponding author: David A. Rudd, Nicolas H. Voelcker

Current address: Monash Institute of Pharmaceutical Sciences, Monash University, 381 Royal Parade, VIC 3052, Australia.

E-mail: david.rudd@monash.edu, nicolas.voelcker@monash.edu;

Fax: +61 3 9903 9581.

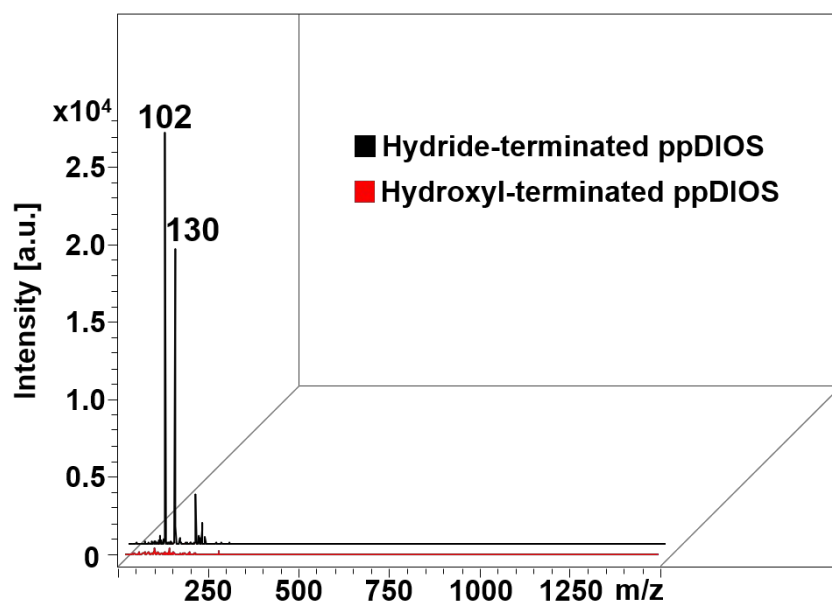

**Figure S1:** Background mass spectra for freshly etched (hydride-terminated) and ozone-oxidised (hydroxyl-terminated) ppDIOS surfaces. Background peaks are observed at  $m/z$  102, 130, 198 and 212.

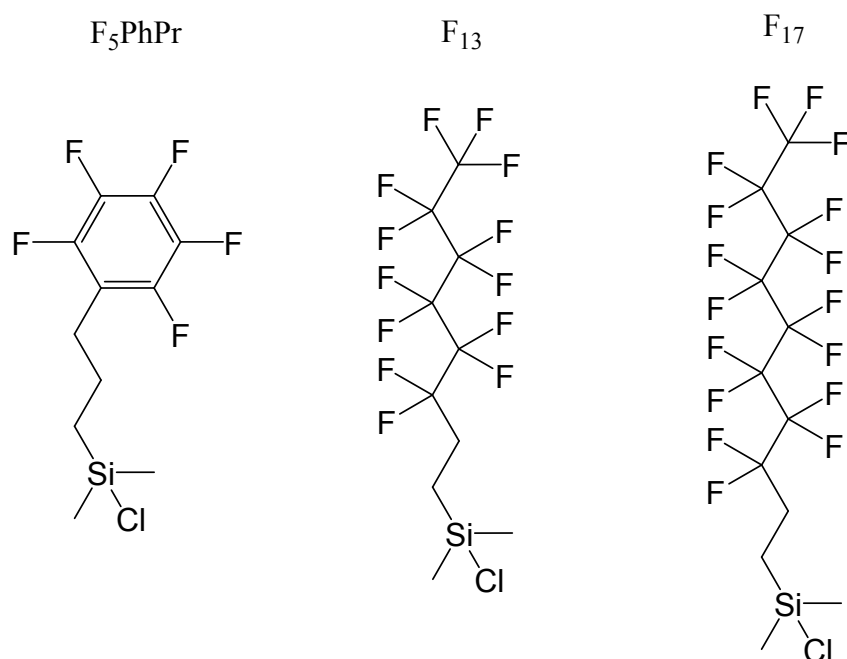

**Figure S2.** Chemical structures of  $F_5PhPr$ ,  $F_{13}$  and  $F_{17}$ , common silanes used to functionalise DIOS surfaces.

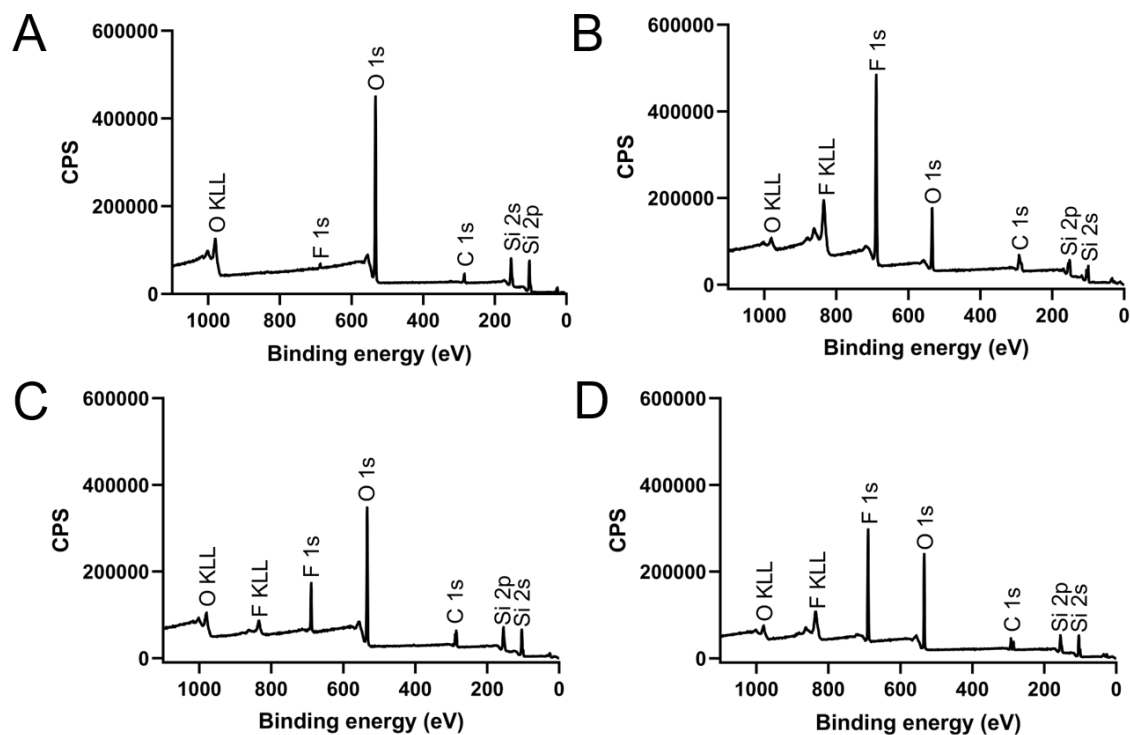

**Figure S3:** X-ray photoelectron spectroscopy (XPS) survey spectra for DIOS surfaces functionalised via A) ozone-oxidation, B) plasma polymerisation, C) F<sub>5</sub>PhPr-silanisation and D) F<sub>13</sub>-silanisation.

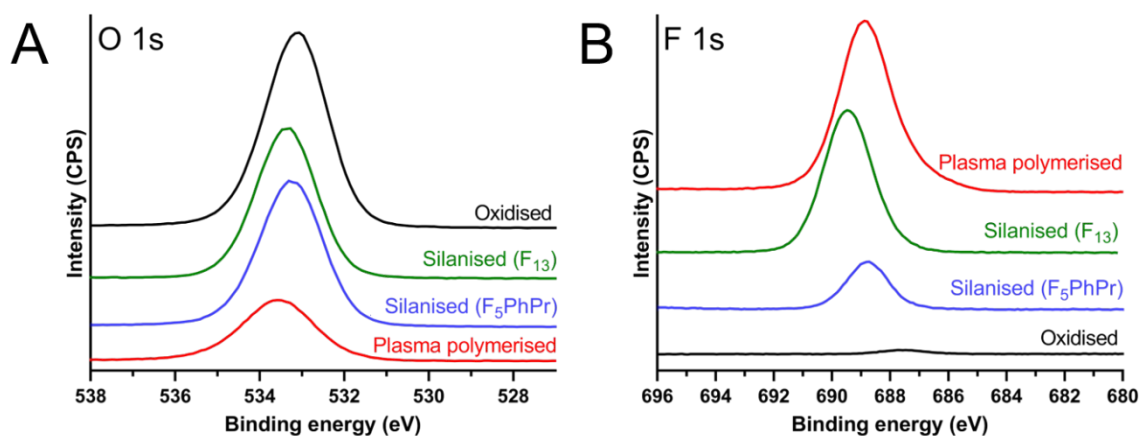

**Figure S4:** XPS analysis for functionalised DIOS surfaces showing A) high-resolution O 1s spectra and B) high-resolution F 1s spectra.

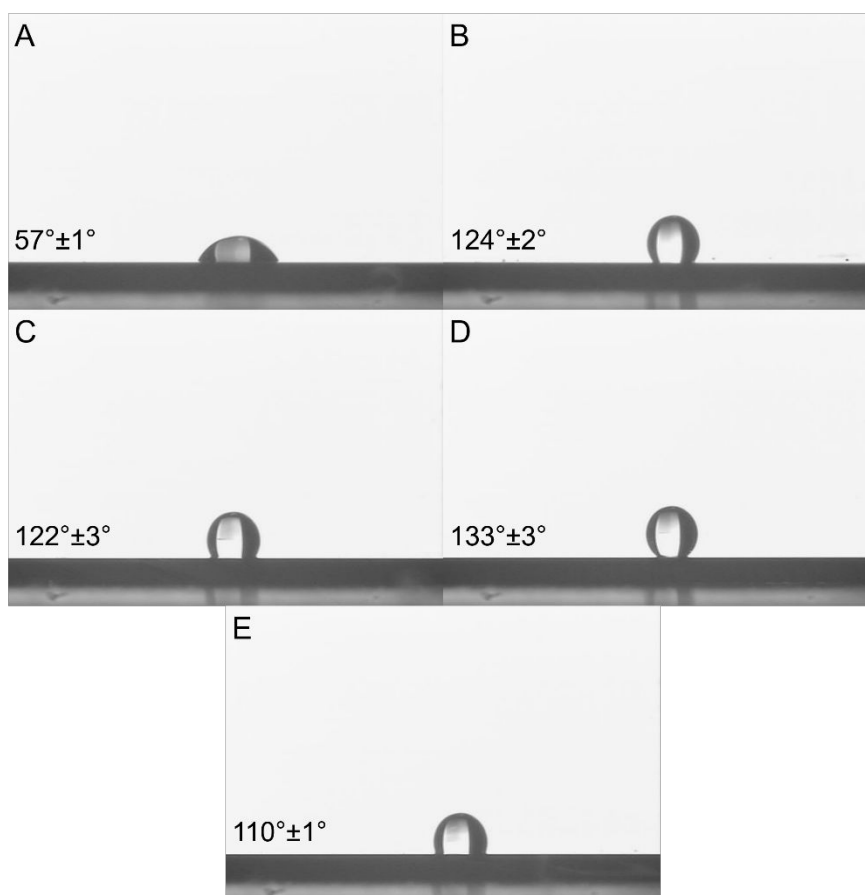

**Figure S5:** Water contact angle (WCA) measurements for DIOS substrates following A) ozone-oxidation, B) plasma polymerisation, C)  $F_5PhPr$ -silane functionalisation, D)  $F_{13}$ -silane functionalisation, and E)  $F_{17}$ -silane functionalisation. WCA was determined using 1  $\mu$ L of water on a contact angle goniometer.

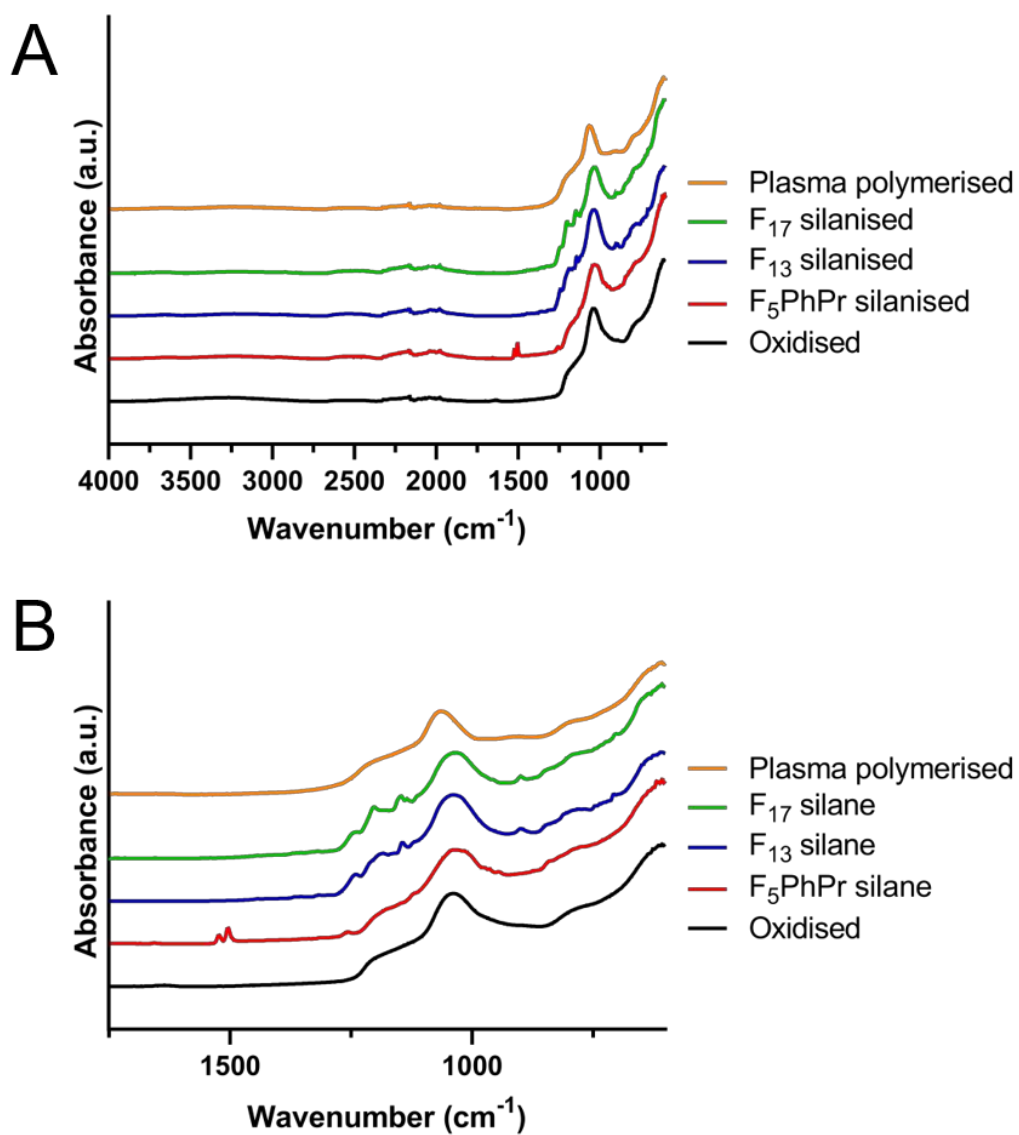

**Figure S6.** IR spectra overlays of oxidised, plasma polymerised and silanised DIOS surfaces between A) 4000-600  $\text{cm}^{-1}$  and B) 1750-600  $\text{cm}^{-1}$ .

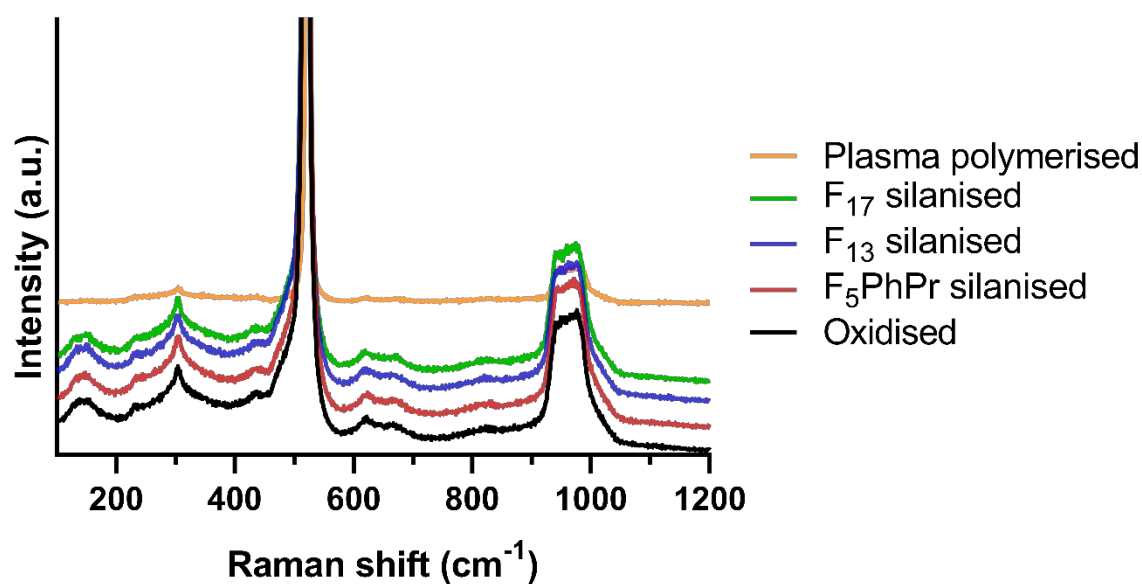

**Figure S7.** Raman spectra overlays of oxidised, plasma polymerised and silanised DIOS surfaces.

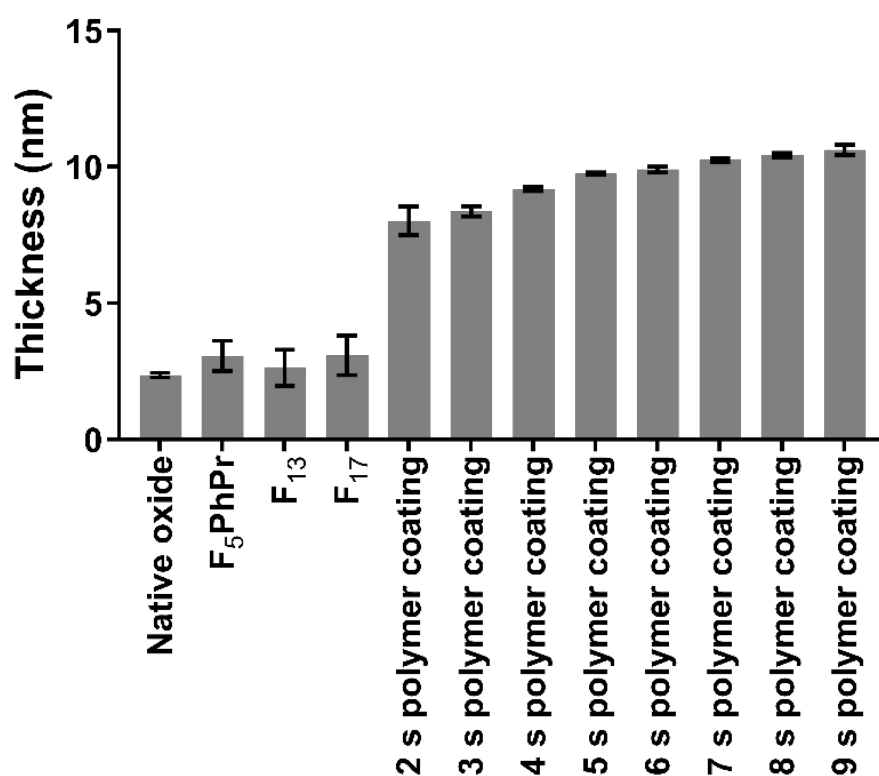

**Figure S8:** Average thickness of ppDIOS substrates following fluorocarbon gas passivation at various lengths of time. The native oxide layer present on the Si substrate,  $\text{F}_5\text{PhPr}$ ,  $\text{F}_{13}$  and  $\text{F}_{17}$ -silanes, have been included for comparison. Error bars correspond to the standard deviation (n=3).



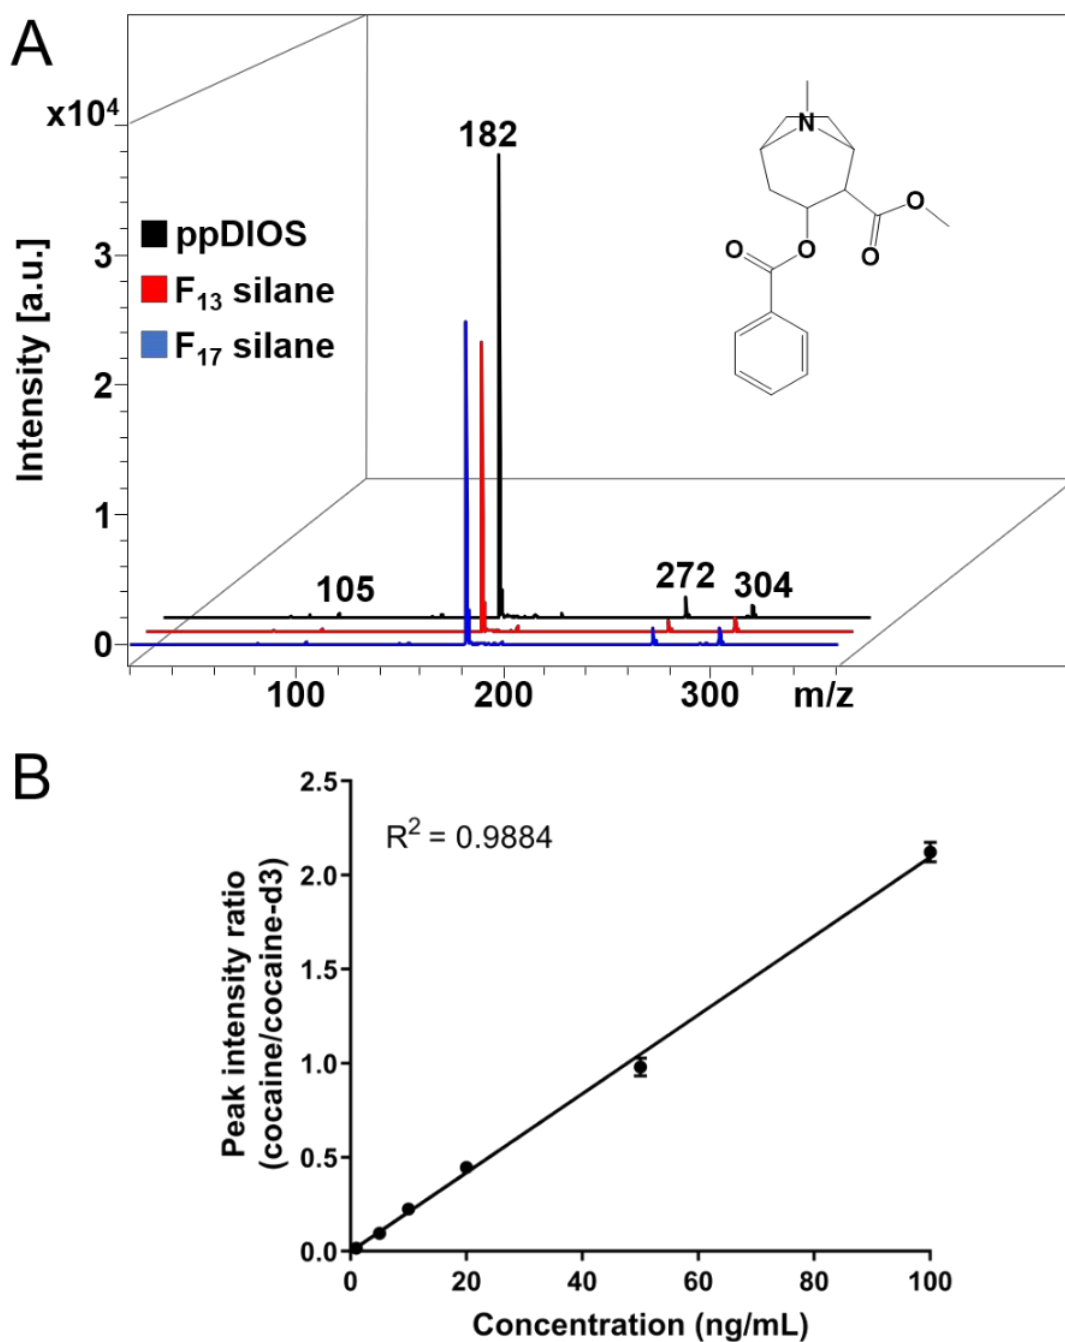

**Figure S10.** (A) Representative mass spectrum for cocaine (100 ng/mL, in water) at an ion of  $m/z$  304, analysed using DIOS-MS on a ppDIOS surface. Fragment peaks are observed at  $m/z$  105,  $m/z$  182 and  $m/z$  272. (B) Linear regression curve for cocaine in water for concentrations ranging from 1 to 100 ng/mL. Error bars correspond to the standard deviation ( $n=3$ ).



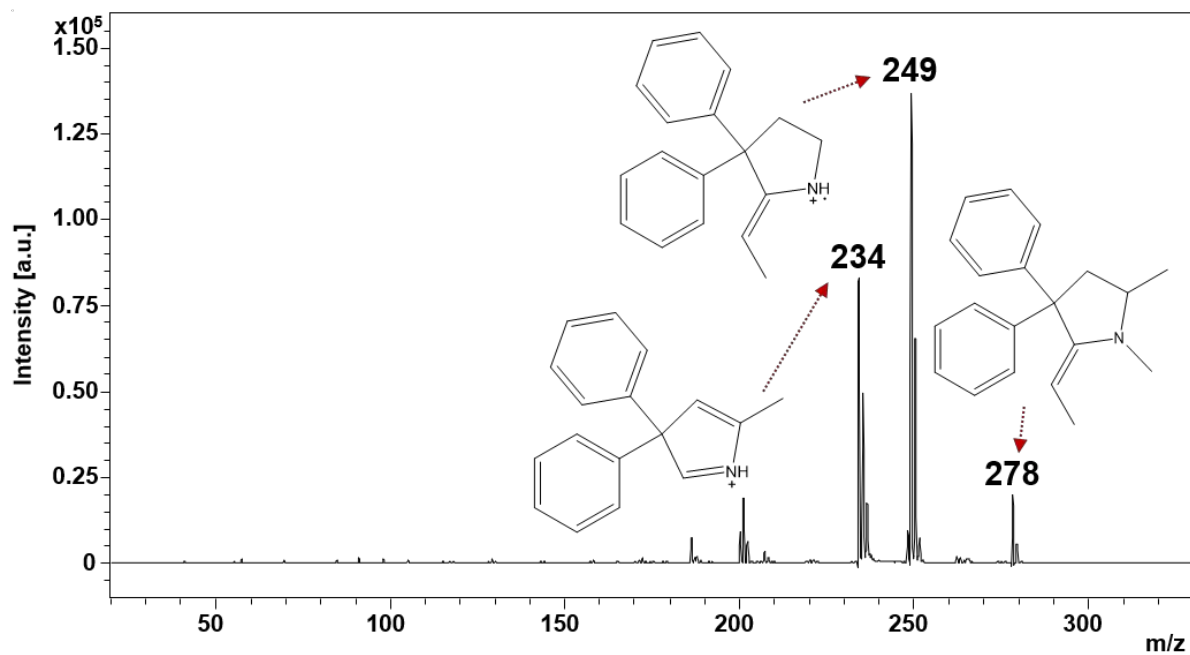

**Figure S11.** MS/MS mass spectrum for EDDP, a major urinary metabolite of methadone, at an ion of  $m/z$  278, analysed using an  $F_{13}$ -silanised DIOS surface. Fragment peaks are observed at  $m/z$  234 and  $m/z$  249.

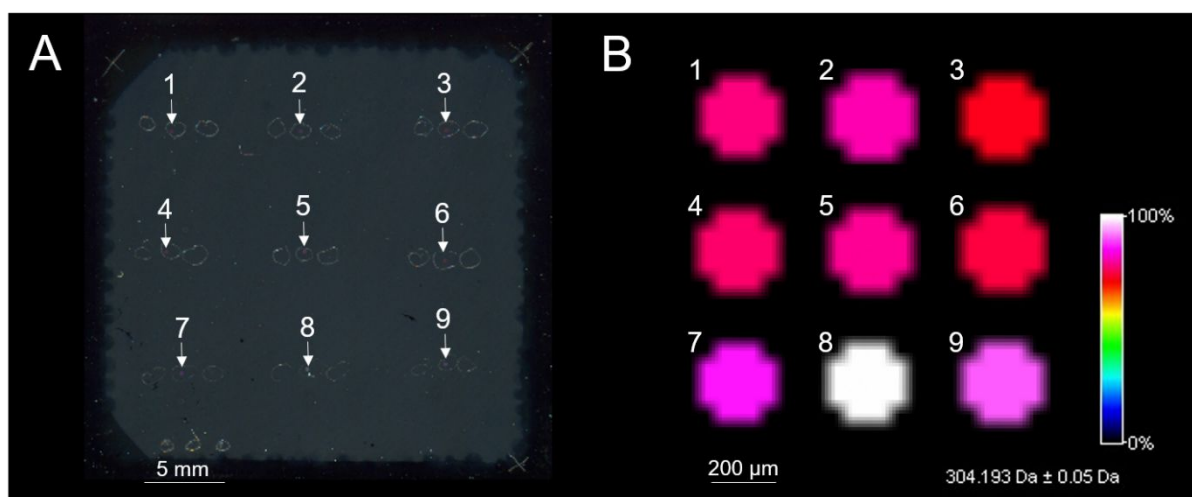

**Figure S12:** ppDIOS imaging of cocaine (100 ng/mL in chloroform) showing: A) a spot array where analysis was performed from nine different locations throughout the ppDIOS surface, and B) zoomed-in view of each of the imaged spots. The parent peak of cocaine was detected at  $m/z$  304. An arbitrary colour scale detailing the relative intensity of each peak is displayed to the right.

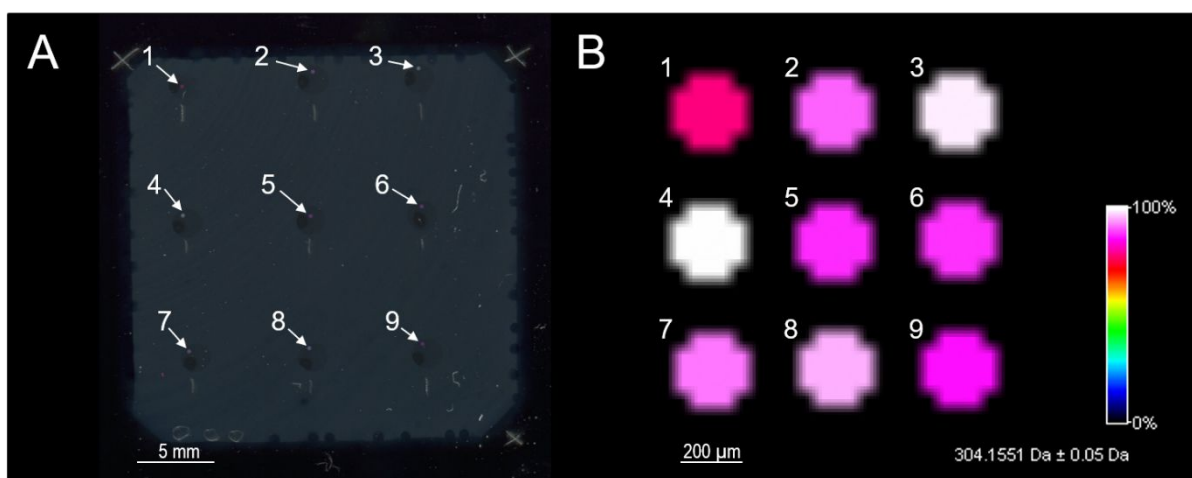

**Figure S13:** DIOS imaging of cocaine (100 ng/mL in chloroform) showing: A) a spot array where analysis was performed from nine different locations throughout the DIOS surface, and B) zoomed-in view of each of the imaged spots. The parent peak of cocaine was detected at  $m/z$  304. An arbitrary colour scale detailing the relative intensity of each peak is displayed to the right. Reprinted with permission from (1). Copyright (2020) American Chemical Society.

## References

1. Minhas, R. S.; Rudd, D. A.; Al Hmoud, H. Z.; Guinan, T. M.; Kirkbride, K. P.; Voelcker, N. H., Rapid Detection of Anabolic and Narcotic Doping Agents in Saliva and Urine By Means of Nanostructured Silicon SALDI Mass Spectrometry. *ACS Applied Materials & Interfaces* **2020**, 12 (28), 31195-31204.
